# Supplementary material for: Real-time monitored photocatalytic activity and electrochemical performance of an rGO/Pt nanocomposite synthesizedviaa green approach
Source: Royal Society of Chemistry journal article supplement (doi:10.1039/d0ra00541j), 2020-01-01
Supplement: d0ra00541j1.pdf [file d0ra00541j1.pdf]

## Supporting Information

### Real-time monitored photocatalytic activity and electrochemical performance of rGO/Pt nanocomposite synthesized *via* green approach

Satish Kasturi<sup>1</sup>, Sri Ramulu Torati<sup>1\*</sup>, Yun Ji Eom<sup>1</sup>, Syafiq Ahmad<sup>1</sup>, Byong-June Lee<sup>2</sup>, Jong-Sung Yu<sup>2</sup>, CheolGi Kim<sup>1\*</sup>

<sup>1</sup>Department of Emerging Materials Science, DGIST, Daegu-42988, Republic of Korea

<sup>2</sup>Department of Energy Science and Engineering, DGIST, Daegu-42988, Republic of Korea

\*Corresponding authors: Tel: +82-53-785-6516, Fax: +82-53-785-6509

E-mail: [srtorati@dgist.ac.kr](mailto:srtorati@dgist.ac.kr) (Sri Ramulu Torati) [cgkim@dgist.ac.kr](mailto:cgkim@dgist.ac.kr) (CheolGi Kim)

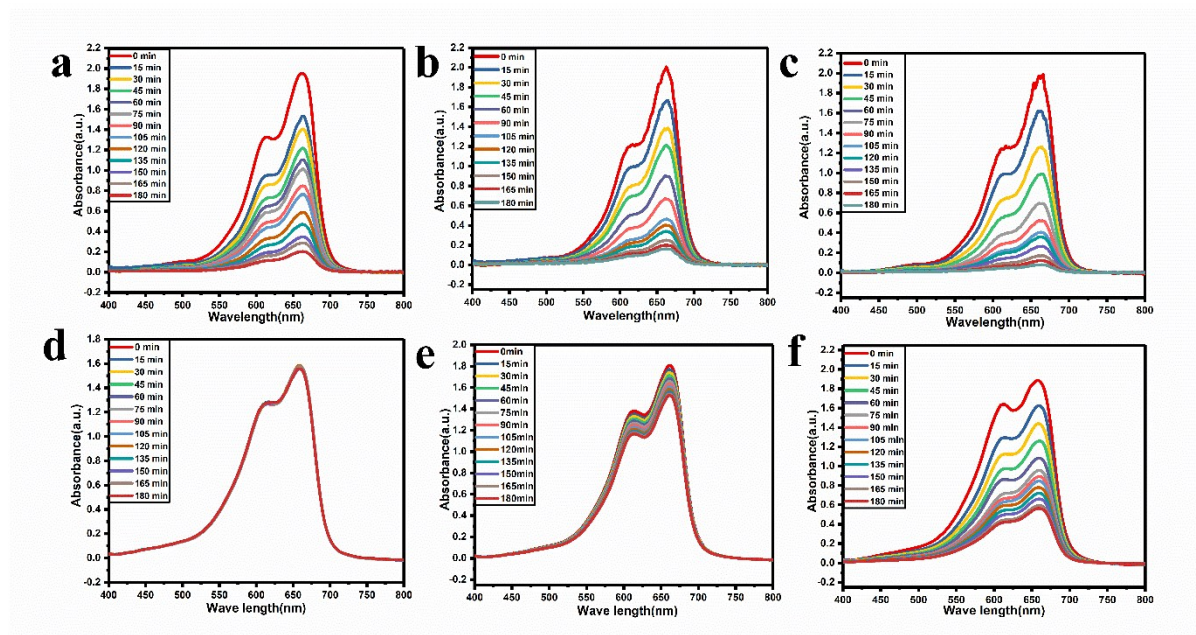

**Fig. S1.** Photocatalytic degradation of MB in presence of (a) rGO/Pt1, (b) rGO/Pt2, (c) rGO/Pt3 (d) MB without catalyst (e) rGO/Pt4 in dark mode, and (f) rGO catalyst.

**Table. S1.** Atomic weight percentage of rGO/Pt1, rGO/Pt2, rGO/Pt3 and rGO/Pt4 nanocomposites obtained from XPS.

| <b>Samples</b> | <b>Atomic Wt.%<br/>of Carbon</b> | <b>Atomic Wt.%<br/>of Carbon</b> | <b>Atomic Wt.%<br/>of Platinum</b> |
|----------------|----------------------------------|----------------------------------|------------------------------------|
| rGO/Pt1        | 80.45                            | 19.94                            | 1.61                               |
| rGO/Pt2        | 78.88                            | 18.96                            | 2.16                               |
| rGO/Pt3        | 77.96                            | 18.06                            | 3.98                               |
| rGO/Pt4        | 77.18                            | 17.09                            | 5.73                               |

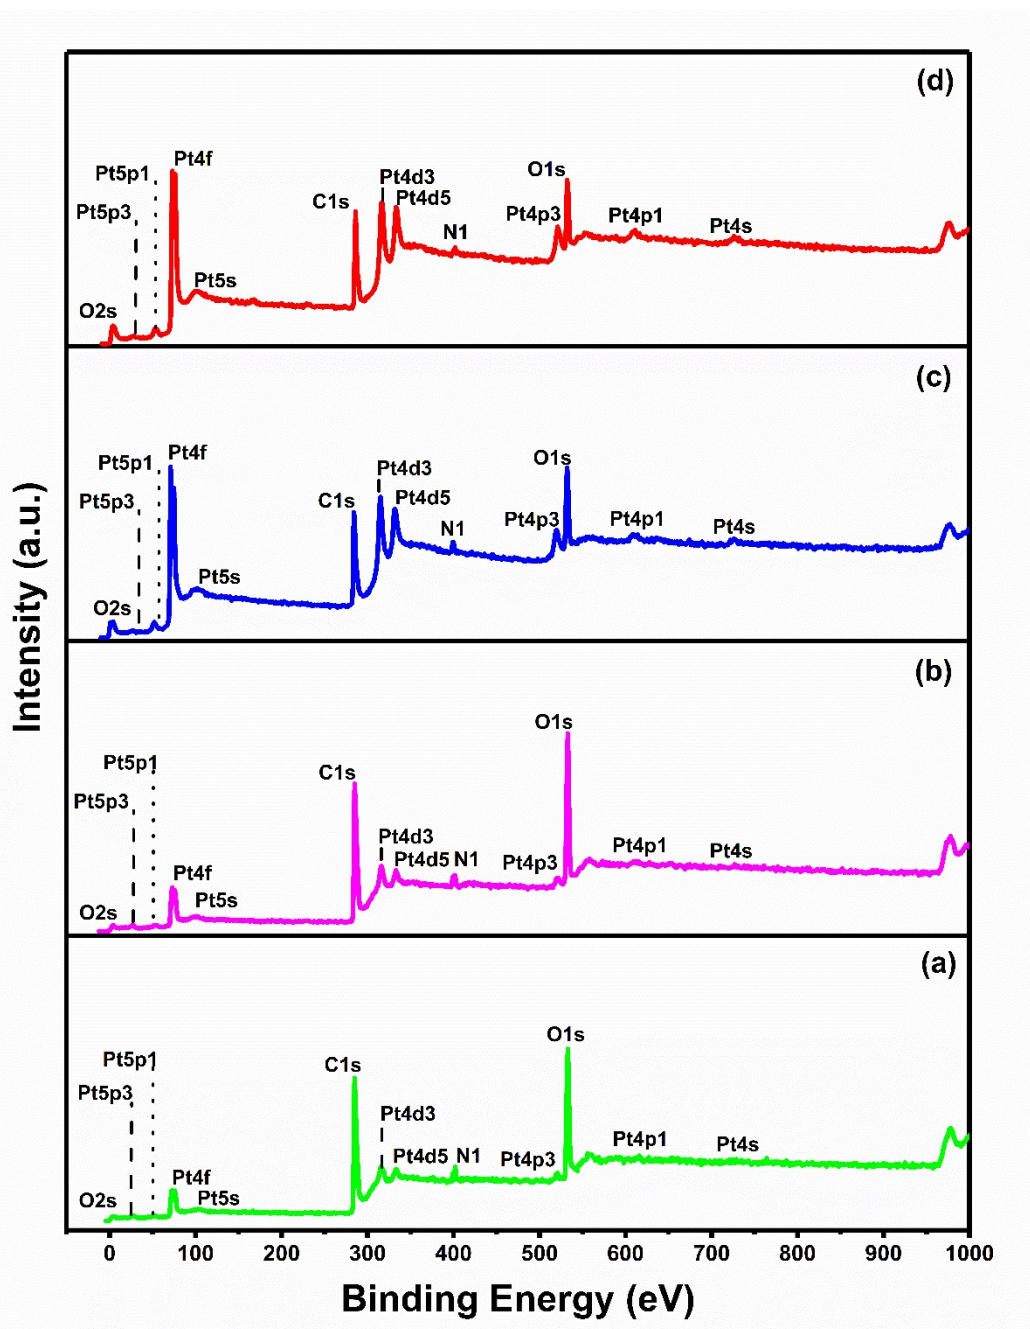

**Fig. S2.** XPS survey scans of (a) rGO/Pt1, (b) rGO/Pt2, (c) rGO/Pt3 and (d) rGO/Pt4 nanocomposites.

**Table. S2.** BET Textural analysis of (a) rGO/Pt1, (b) rGO/Pt2, (c) rGO/Pt3 and (d) rGO/Pt4 nanocomposites.

| <b>Samples</b> | <b><math>S_{\text{BET}}/\text{m}^2\text{g}^{-1}</math><br/>(specific<br/>surface area)</b> | <b><math>S_{\text{BET}}/\text{m}^2\text{g}^{-1}</math><br/>(specific<br/>surface area)</b> | <b><math>V_{\text{meso}}/\text{cm}^3\text{g}^{-1}</math><br/>(mesopore<br/>volume)</b> | <b><math>v_{\text{total}}/\text{cm}^3\text{g}^{-1}</math><br/>(total pore<br/>volume)</b> | <b>psd /nm<br/>(pore size<br/>distribution)</b> |
|----------------|--------------------------------------------------------------------------------------------|--------------------------------------------------------------------------------------------|----------------------------------------------------------------------------------------|-------------------------------------------------------------------------------------------|-------------------------------------------------|
| rGO/Pt1        | 13                                                                                         | 0.003                                                                                      | 0.033                                                                                  | 0.036                                                                                     | 3.9                                             |
| rGO/Pt2        | 13.4                                                                                       | 0.005                                                                                      | 0.035                                                                                  | 0.04                                                                                      | 3.5                                             |
| rGO/Pt3        | 25                                                                                         | 0.006                                                                                      | 0.05                                                                                   | 0.056                                                                                     | 3.7                                             |
| rGO/Pt4        | 33.6                                                                                       | 0.006                                                                                      | 0.066                                                                                  | 0.072                                                                                     | 4.4                                             |
